# Supplementary material for: Plumbagin has an inhibitory effect on the growth of TSCC PDX model and it enhances the anticancer efficacy of cisplatin
Source: Aging (Albany NY). 2023 Nov 3;15(21):12225–50. doi: 10.18632/aging.205175 (PMC10683608; doi:10.18632/aging.205175)
Supplement: Supplementary Tables 1-2 [file aging-15-205175-s002.xlsx]

## Sheet: Supplementary Table 1
Supplementary Table 1. Expression of the differential genes in the plumbagin group compared with the control group.
Gene id	Gene Name	Fold Change	log2(FoldChange)	P Value	Change trend
ENSG00000207145	SNORA18	7379.47	12.8493	4.75e-05	up
ENSG00000000971	CFH	244.808	7.93551	0.000215447	up
ENSG00000151491	EPS8	188.915	7.56159	1.44e-05	up
ENSG00000095585	BLNK	168.679	7.39814	1.98e-05	up
ENSG00000115414	FN1	48.9442	5.61307	0.000173305	up
ENSG00000261780	LINC02582	16.9416	4.0825	0.000127479	up
ENSG00000161798	AQP5	15.3904	3.94396	0.000642734	up
ENSG00000125144	MT1G	9.94079	3.31336	8.61e-07	up
ENSG00000166825	ANPEP	7.28159	2.86425	3.37e-07	up
ENSG00000124664	SPDEF	6.60787	2.72418	2.38e-08	up
ENSG00000158985	CDC42SE2	5.53872	2.46955	1.97e-05	up
ENSG00000235043	TECRP1	5.4367	2.44273	3.86e-05	up
ENSG00000262477	AC021224.1	5.36024	2.4223	0.000133787	up
ENSG00000164292	RHOBTB3	5.26012	2.3951	1.66e-08	up
ENSG00000225071	AC004552.1	5.21101	2.38156	0.000760184	up
ENSG00000210154	MT-TD	5.03652	2.33243	0.000566689	up
ENSG00000171451	DSEL	5.01502	2.32626	1.62e-06	up
ENSG00000092758	COL9A3	4.75674	2.24997	9.92e-07	up
ENSG00000106991	ENG	4.56546	2.19076	2.77e-06	up
ENSG00000176692	FOXC2	4.55005	2.18588	0.000163289	up
ENSG00000109610	SOD3	4.20706	2.07281	1.43e-06	up
ENSG00000213999	MEF2B	4.18038	2.06364	0.000150213	up
ENSG00000125798	FOXA2	4.08349	2.0298	7.28e-06	up
ENSG00000170017	ALCAM	4.06076	2.02175	4.5e-05	up
ENSG00000223612	AC241585.1	3.98773	1.99557	0.000520407	up
ENSG00000136205	TNS3	3.9138	1.96857	1.97e-05	up
ENSG00000026036	RTEL1-TNFRSF6B	3.88921	1.95948	0.000509519	up
ENSG00000198406	BZW1P2	3.86478	1.95039	3.84e-06	up
ENSG00000210191	MT-TL2	3.67786	1.87887	0.000427054	up
ENSG00000198910	L1CAM	3.6367	1.86263	7.53e-05	up
ENSG00000210184	MT-TS2	3.55248	1.82883	0.000525451	up
ENSG00000151364	KCTD14	3.53697	1.82251	0.000138181	up
ENSG00000185298	CCDC137	3.53301	1.8209	3.29e-06	up
ENSG00000110492	MDK	3.52614	1.81809	0.000248056	up
ENSG00000170421	KRT8	3.48593	1.80155	1.08e-06	up
ENSG00000178665	ZNF713	3.47446	1.79679	0.000121053	up
ENSG00000136997	MYC	3.41317	1.77111	0.000110641	up
ENSG00000101188	NTSR1	3.39365	1.76284	1.12e-07	up
ENSG00000041982	TNC	3.37755	1.75598	0.000256009	up
ENSG00000116774	OLFML3	3.37601	1.75532	0.000110254	up
ENSG00000120093	HOXB3	3.29927	1.72215	0.000948338	up
ENSG00000215492	HNRNPA1P7	3.26789	1.70836	0.000219064	up
ENSG00000132434	LANCL2	3.23623	1.69432	0.000679012	up
ENSG00000249936	RAC1P2	3.19076	1.6739	2.83e-05	up
ENSG00000261607	AC140658.4	3.09157	1.62834	8.23e-05	up
ENSG00000244165	P2RY11	3.07425	1.62023	1.25e-05	up
ENSG00000106571	GLI3	3.074	1.62012	0.000313021	up
ENSG00000113758	DBN1	3.06919	1.61786	0.000499174	up
ENSG00000180176	TH	3.06804	1.61732	1.11e-05	up
ENSG00000076706	MCAM	3.05351	1.61047	0.000215903	up
ENSG00000234851	RPL23AP42	3.03945	1.60381	1.65e-05	up
ENSG00000209082	MT-TL1	3.00255	1.58619	4.47e-05	up
ENSG00000244398	AC116533.1	2.96549	1.56827	0.000237833	up
ENSG00000223749	MIR503HG	2.931	1.55139	9.7e-05	up
ENSG00000196656	AC004057.1	2.86796	1.52003	0.000453418	up
ENSG00000141753	IGFBP4	2.83779	1.50477	0.000190156	up
ENSG00000108821	COL1A1	2.82121	1.49631	0.000901942	up
ENSG00000131650	KREMEN2	2.80945	1.49029	0.000343838	up
ENSG00000008441	NFIX	2.7595	1.46441	0.000253277	up
ENSG00000101224	CDC25B	2.72753	1.44759	0.000354549	up
ENSG00000188827	SLX4	2.7087	1.4376	0.000326906	up
ENSG00000129103	SUMF2	2.67259	1.41824	0.000840026	up
ENSG00000171574	ZNF584	2.65347	1.40788	4e-07	up
ENSG00000067191	CACNB1	2.63977	1.40041	8e-06	up
ENSG00000166147	FBN1	2.62772	1.39381	0.000478034	up
ENSG00000139718	SETD1B	2.62754	1.39371	3.38e-06	up
ENSG00000155034	FBXL18	2.62499	1.39231	8.5e-06	up
ENSG00000183979	NPB	2.61268	1.38553	3.42e-06	up
ENSG00000242071	RPL7AP6	2.60357	1.38049	0.000296455	up
ENSG00000120129	DUSP1	2.57721	1.36581	0.000223893	up
ENSG00000169174	PCSK9	2.56904	1.36123	0.000987101	up
ENSG00000243716	NPIPB5	2.55723	1.35458	0.000559786	up
ENSG00000090339	ICAM1	2.55446	1.35302	0.000218491	up
ENSG00000178209	PLEC	2.52314	1.33522	0.000158388	up
ENSG00000196187	TMEM63A	2.50477	1.32468	0.000606856	up
ENSG00000159217	IGF2BP1	2.49355	1.3182	7.42e-05	up
ENSG00000117020	AKT3	2.4908	1.31661	0.000268479	up
ENSG00000141510	TP53	2.4609	1.29919	0.000362896	up
ENSG00000198763	MT-ND2	2.44909	1.29224	5.87e-05	up
ENSG00000130508	PXDN	2.44281	1.28854	0.000606627	up
ENSG00000204516	MICB	2.41326	1.27098	0.000479771	up
ENSG00000173218	VANGL1	2.41117	1.26973	0.00021344	up
ENSG00000169710	FASN	2.38816	1.2559	0.000124703	up
ENSG00000121716	PILRB	2.38078	1.25143	1.63e-05	up
ENSG00000173267	SNCG	2.37577	1.24839	0.000715742	up
ENSG00000225972	MTND1P23	2.37545	1.2482	4.2e-05	up
ENSG00000225630	MTND2P28	2.36913	1.24436	4.64e-05	up
ENSG00000198768	APCDD1L	2.36877	1.24414	0.000626613	up
ENSG00000178252	WDR6	2.36782	1.24356	4.74e-05	up
ENSG00000126464	PRR12	2.3255	1.21754	0.000365408	up
ENSG00000260404	AC110079.1	2.31894	1.21347	0.000941917	up
ENSG00000123146	ADGRE5	2.31761	1.21264	0.000184023	up
ENSG00000111676	ATN1	2.31351	1.21008	0.000264791	up
ENSG00000115568	ZNF142	2.30476	1.20461	0.00067085	up
ENSG00000198886	MT-ND4	2.29796	1.20035	8.62e-05	up
ENSG00000136854	STXBP1	2.29192	1.19656	8.63e-06	up
ENSG00000183856	IQGAP3	2.29007	1.19539	0.00019984	up
ENSG00000243789	JMJD7	2.2853	1.19238	0.000267141	up
ENSG00000140534	TICRR	2.25904	1.17571	8.95e-06	up
ENSG00000138867	GUCD1	2.24224	1.16494	0.000980209	up
ENSG00000169047	IRS1	2.23679	1.16143	0.000843891	up
ENSG00000198888	MT-ND1	2.22667	1.15489	5.21e-05	up
ENSG00000266962	AC067852.2	2.21531	1.14751	0.000534087	up
ENSG00000148773	MKI67	2.20641	1.1417	9.61e-05	up
ENSG00000071894	CPSF1	2.20378	1.13998	0.000345709	up
ENSG00000013573	DDX11	2.1959	1.13482	0.000328549	up
ENSG00000266173	STRADA	2.19174	1.13207	1.24e-05	up
ENSG00000167595	PROSER3	2.18836	1.12985	0.000398944	up
ENSG00000159335	PTMS	2.18649	1.12862	3.1e-05	up
ENSG00000172534	HCFC1	2.18284	1.12621	6.37e-05	up
ENSG00000158292	GPR153	2.16091	1.11164	0.000262677	up
ENSG00000248527	MTATP6P1	2.16012	1.11111	0.000235759	up
ENSG00000160877	NACC1	2.15099	1.105	0.000118659	up
ENSG00000131759	RARA	2.1472	1.10246	0.000160736	up
ENSG00000198899	MT-ATP6	2.14132	1.0985	0.000475233	up
ENSG00000138821	SLC39A8	2.10611	1.07458	0.000768546	up
ENSG00000167548	KMT2D	2.10582	1.07438	0.000646051	up
ENSG00000212907	MT-ND4L	2.0816	1.05769	0.000467749	up
ENSG00000198727	MT-CYB	2.07367	1.05218	0.000351516	up
ENSG00000137337	MDC1	2.05889	1.04187	0.000985336	up
ENSG00000133142	TCEAL4	2.04771	1.03401	0.000359088	up
ENSG00000167513	CDT1	2.03558	1.02544	0.000541837	up
ENSG00000166851	PLK1	2.02479	1.01777	0.000304544	up
ENSG00000198712	MT-CO2	2.01822	1.01308	0.000227014	up
ENSG00000050405	LIMA1	0.495538	-1.01293	0.000390936	down
ENSG00000152219	ARL14EP	0.494989	-1.01453	5.83e-05	down
ENSG00000186007	LEMD1	0.486334	-1.03998	0.000945276	down
ENSG00000172057	ORMDL3	0.479884	-1.05924	0.000785752	down
ENSG00000133135	RNF128	0.477623	-1.06606	0.000607005	down
ENSG00000198918	RPL39	0.465463	-1.10326	4.5e-06	down
ENSG00000213639	PPP1CB	0.464947	-1.10486	2.09e-05	down
ENSG00000057019	DCBLD2	0.459561	-1.12167	2.31e-06	down
ENSG00000112972	HMGCS1	0.457446	-1.12833	1.43e-05	down
ENSG00000164379	FOXQ1	0.457245	-1.12896	7.88e-05	down
ENSG00000197780	TAF13	0.453447	-1.141	0.000777818	down
ENSG00000166275	BORCS7	0.441875	-1.17829	0.000623416	down
ENSG00000168374	ARF4	0.441559	-1.17932	0.000602555	down
ENSG00000057657	PRDM1	0.441318	-1.18011	1.5e-05	down
ENSG00000267520	AC010733.1	0.437221	-1.19356	0.000641446	down
ENSG00000145425	RPS3A	0.436071	-1.19736	7.28e-05	down
ENSG00000168300	PCMTD1	0.426969	-1.2278	0.000150609	down
ENSG00000110042	DTX4	0.419187	-1.25434	0.000593994	down
ENSG00000154978	VOPP1	0.416689	-1.26296	0.000116229	down
ENSG00000167767	KRT80	0.412976	-1.27587	0.000466874	down
ENSG00000179674	ARL14	0.411927	-1.27954	0.000954893	down
ENSG00000130066	SAT1	0.411084	-1.28249	0.000800973	down
ENSG00000185640	KRT79	0.403099	-1.31079	0.000406242	down
ENSG00000215472	RPL17-C18orf32	0.401796	-1.31547	1.13e-05	down
ENSG00000151876	FBXO4	0.400427	-1.32039	0.000515076	down
ENSG00000110852	CLEC2B	0.388285	-1.36481	0.000466621	down
ENSG00000100744	GSKIP	0.387104	-1.36921	6.07e-06	down
ENSG00000284292	AC004922.1	0.379721	-1.39699	0.000497976	down
ENSG00000169155	ZBTB43	0.374114	-1.41845	2.08e-08	down
ENSG00000183291	SELENOF	0.360936	-1.47018	0.000691992	down
ENSG00000114166	KAT2B	0.356132	-1.48952	0.000475529	down
ENSG00000177917	ARL6IP6	0.346568	-1.52879	0.00045548	down
ENSG00000085231	AK6	0.335818	-1.57425	8.09e-06	down
ENSG00000143756	FBXO28	0.33499	-1.57781	6.11e-05	down
ENSG00000172867	KRT2	0.333044	-1.58622	0.000627245	down
ENSG00000162496	DHRS3	0.328625	-1.60549	0.000157798	down
ENSG00000173926	MARCHF3	0.326312	-1.61568	0.000732768	down
ENSG00000122643	NT5C3A	0.324619	-1.62318	0.00030054	down
ENSG00000283293	RN7SK	0.320987	-1.63941	1.16e-06	down
ENSG00000167601	AXL	0.320704	-1.64068	0.000378339	down
ENSG00000100532	CGRRF1	0.318652	-1.64995	0.000175146	down
ENSG00000169193	CCDC126	0.317479	-1.65527	4.36e-06	down
ENSG00000215869	AC092506.1	0.316199	-1.6611	4e-06	down
ENSG00000169740	ZNF32	0.310399	-1.6878	0.000280493	down
ENSG00000135002	RFK	0.296422	-1.75427	2.78e-05	down
ENSG00000121350	PYROXD1	0.285334	-1.80928	3.64e-08	down
ENSG00000119862	LGALSL	0.280008	-1.83646	1.31e-06	down
ENSG00000166922	SCG5	0.278446	-1.84453	0.000100365	down
ENSG00000228305	PRELID1P6	0.271425	-1.88138	0.000790459	down
ENSG00000146674	IGFBP3	0.243687	-2.0369	1.12e-05	down
ENSG00000168675	LDLRAD4	0.238371	-2.06872	1.91e-07	down
ENSG00000136048	DRAM1	0.234778	-2.09063	0.000304495	down
ENSG00000108244	KRT23	0.232588	-2.10415	2.47e-06	down
ENSG00000113269	RNF130	0.226767	-2.14072	8.79e-05	down			.
ENSG00000266460	AC021506.1	0.202008	-2.30752	0.000124644	down
ENSG00000260566	AC127459.1	0.184399	-2.4391	8.97e-05	down
ENSG00000257529	RPL36A-HNRNPH2	0.110786	-3.17415	9.27e-09	down
ENSG00000222328	RNU2-2P	0.0486683	-4.36087	0.000476609	down
ENSG00000269897	COMMD3-BMI1	1.70935e-05	-15.8362	6.02e-11	down

## Sheet: Supplementary Table 2
Supplementary Table 2. Expression of the differential genes in the cisplatin group compared with the control group.
Gene id	Gene Name	Fold Change	log2(FoldChange)	P Value	Change trend
ENSG00000138685	FGF2	685.511	9.42104	5.83e-21	up
ENSG00000101443	WFDC2	470.02	8.87658	1.57e-08	up
ENSG00000134339	SAA2	301.115	8.23417	1.77e-10	up
ENSG00000197249	SERPINA1	135.64	7.08364	0.000166594	up
ENSG00000273333	AL662884.1	132.319	7.04788	9.78e-05	up
ENSG00000173432	SAA1	74.1162	6.21172	2.15e-10	up
ENSG00000124875	CXCL6	64.434	6.00975	4.08e-06	up
ENSG00000156966	B3GNT7	62.2067	5.959	2.66e-15	up
ENSG00000100985	MMP9	60.4563	5.91782	6.1e-08	up
ENSG00000184371	CSF1	45.979	5.5229	0.00212985	up
ENSG00000196668	LINC00173	45.5711	5.51005	7.3e-05	up
ENSG00000205426	KRT81	35.7041	5.15802	0.000604055	up
ENSG00000136048	DRAM1	33.96	5.08576	0.00424089	up
ENSG00000163739	CXCL1	31.5794	4.98091	3.69e-10	up
ENSG00000134668	SPOCD1	25.1042	4.64986	9.63e-12	up
ENSG00000123689	G0S2	24.7707	4.63056	2.33e-23	up
ENSG00000184922	FMNL1	22.8974	4.51711	1.12e-16	up
ENSG00000169248	CXCL11	19.085	4.25437	4.2e-09	up
ENSG00000121895	TMEM156	18.2854	4.19262	0.00013943	up
ENSG00000163734	CXCL3	16.9335	4.0818	7.98e-07	up
ENSG00000108342	CSF3	16.8281	4.0728	1.25e-05	up
ENSG00000169245	CXCL10	16.6681	4.05901	3.07e-13	up
ENSG00000125730	C3	16.0954	4.00858	0.000446889	up
ENSG00000188060	RAB42	16.0905	4.00813	1.02e-12	up
ENSG00000122862	SRGN	15.1305	3.91938	6.96e-06	up
ENSG00000118849	RARRES1	14.6545	3.87328	1.03e-05	up
ENSG00000170214	ADRA1B	13.2364	3.72644	4.82e-08	up
ENSG00000167601	AXL	13.0956	3.71101	8.23e-18	up
ENSG00000215113	CXorf49B	13.0201	3.70267	5.46e-07	up
ENSG00000271503	CCL5	12.7862	3.67652	3.48e-19	up
ENSG00000172927	MYEOV	12.6902	3.66564	7.29e-08	up
ENSG00000276107	AC037198.1	12.485	3.64213	9.69e-06	up
ENSG00000215115	CXorf49	12.0494	3.59089	7.54e-08	up
ENSG00000125726	CD70	11.824	3.56365	2.9e-05	up
ENSG00000170421	KRT8	10.7062	3.42037	6.01e-20	up
ENSG00000124191	TOX2	10.2455	3.35692	1.44e-08	up
ENSG00000173391	OLR1	9.40299	3.23312	2.55e-16	up
ENSG00000104783	KCNN4	9.06299	3.17999	4.85e-05	up
ENSG00000146070	PLA2G7	8.91011	3.15544	5.61e-07	up
ENSG00000065923	SLC9A7	8.45158	3.07922	2.99e-11	up
ENSG00000110944	IL23A	8.02837	3.00511	6.5e-08	up
ENSG00000188820	CALHM6	7.92865	2.98707	0.000609044	up
ENSG00000135480	KRT7	7.76703	2.95736	0.00107396	up
ENSG00000224769	MUC20P1	7.73553	2.9515	4.29e-05	up
ENSG00000082074	FYB1	7.4726	2.90161	6.33e-07	up
ENSG00000187556	NANOS3	7.33932	2.87565	0.000218758	up
ENSG00000184254	ALDH1A3	7.25143	2.85827	7.05e-09	up
ENSG00000130720	FIBCD1	7.20358	2.84871	6.32e-05	up
ENSG00000019582	CD74	7.16259	2.84048	5.76e-06	up
ENSG00000163430	FSTL1	7.09557	2.82692	9.38e-11	up
ENSG00000164744	SUN3	7.06041	2.81975	1.04e-05	up
ENSG00000163131	CTSS	7.0332	2.81418	5.66e-13	up
ENSG00000227591	HSD11B1-AS1	6.86069	2.77835	0.00139962	up
ENSG00000175003	SLC22A1	6.76294	2.75765	2.07e-18	up
ENSG00000090339	ICAM1	6.64358	2.73196	4.87e-11	up
ENSG00000005001	PRSS22	6.64319	2.73188	9.39e-07	up
ENSG00000198732	SMOC1	6.62014	2.72686	1.15e-12	up
ENSG00000204385	SLC44A4	6.55219	2.71198	1.09e-05	up
ENSG00000110492	MDK	6.50903	2.70244	3.18e-08	up
ENSG00000176945	MUC20	6.46472	2.69259	1.13e-05	up
ENSG00000164932	CTHRC1	6.46134	2.69183	6.22e-07	up
ENSG00000137801	THBS1	6.40095	2.67829	6.99e-10	up
ENSG00000274383	AC103691.1	6.2902	2.65311	0.00192543	up
ENSG00000154133	ROBO4	6.26306	2.64687	7.14e-09	up
ENSG00000164400	CSF2	6.19363	2.63078	4.39e-09	up
ENSG00000102048	ASB9	6.1336	2.61674	1.85e-07	up
ENSG00000002079	MYH16	6.03586	2.59356	5.57e-07	up
ENSG00000138642	HERC6	5.99728	2.58431	3.05e-08	up
ENSG00000023445	BIRC3	5.96847	2.57736	3.7e-06	up
ENSG00000167191	GPRC5B	5.83125	2.54381	3.28e-06	up
ENSG00000173918	C1QTNF1	5.77304	2.52933	0.00378976	up
ENSG00000050344	NFE2L3	5.6497	2.49817	1.31e-10	up
ENSG00000112299	VNN1	5.63726	2.49499	5.43e-06	up
ENSG00000185298	CCDC137	5.60851	2.48762	8.95e-31	up
ENSG00000243566	UPK3B	5.58567	2.48173	9.76e-06	up
ENSG00000167653	PSCA	5.33552	2.41563	0.000172528	up
ENSG00000180353	HCLS1	5.31257	2.40941	8.86e-08	up
ENSG00000140832	MARVELD3	5.29569	2.40482	1.76e-09	up
ENSG00000179750	APOBEC3B	5.12823	2.35846	9.35e-08	up
ENSG00000175130	MARCKSL1	5.12762	2.35829	2.33e-07	up
ENSG00000176170	SPHK1	5.01673	2.32675	1.8e-11	up
ENSG00000026036	RTEL1-TNFRSF6B	4.95076	2.30765	1.02e-05	up
ENSG00000182010	RTKN2	4.94547	2.30611	2.83e-06	up
ENSG00000281406	BLACAT1	4.83202	2.27263	3.37e-07	up
ENSG00000181885	CLDN7	4.82504	2.27054	7.96e-05	up
ENSG00000231131	LNCAROD	4.82286	2.26989	1.17e-07	up
ENSG00000180730	SHISA2	4.77217	2.25464	5.53e-07	up
ENSG00000140511	HAPLN3	4.77047	2.25413	2.71e-08	up
ENSG00000115008	IL1A	4.75878	2.25059	7.82e-09	up
ENSG00000160255	ITGB2	4.75724	2.25013	4.05e-14	up
ENSG00000186469	GNG2	4.68897	2.22927	0.00318524	up
ENSG00000163975	MELTF	4.63562	2.21276	5.34e-06	up
ENSG00000125398	SOX9	4.6275	2.21023	2.98e-07	up
ENSG00000227376	FTH1P16	4.62229	2.20861	0.00037518	up
ENSG00000219435	CATSPERZ	4.59173	2.19904	2.3e-06	up
ENSG00000164292	RHOBTB3	4.5908	2.19875	1.64e-07	up
ENSG00000142910	TINAGL1	4.55968	2.18893	2.32e-12	up
ENSG00000168672	LRATD2	4.5419	2.18329	6.31e-05	up
ENSG00000144810	COL8A1	4.52113	2.17668	4.13e-05	up
ENSG00000103034	NDRG4	4.50364	2.17109	3.61e-07	up
ENSG00000165507	DEPP1	4.47546	2.16204	9.9e-05	up
ENSG00000269906	AL606834.1	4.34169	2.11826	0.00296459	up
ENSG00000149591	TAGLN	4.28329	2.09872	0.000411018	up
ENSG00000131669	NINJ1	4.27487	2.09588	1.78e-07	up
ENSG00000232810	TNF	4.24089	2.08437	9.67e-05	up
ENSG00000122694	GLIPR2	4.2283	2.08008	8.21e-07	up
ENSG00000101255	TRIB3	4.21617	2.07593	3.44e-09	up
ENSG00000092621	PHGDH	4.20542	2.07225	0.000323668	up
ENSG00000120833	SOCS2	4.1348	2.04782	7.92e-06	up
ENSG00000107984	DKK1	4.13114	2.04654	2.36e-11	up
ENSG00000111859	NEDD9	4.1271	2.04513	2.41e-09	up
ENSG00000125538	IL1B	4.11579	2.04117	1.08e-05	up
ENSG00000169429	CXCL8	4.09061	2.03232	1.6e-05	up
ENSG00000231298	MANCR	4.04114	2.01476	7.84e-09	up
ENSG00000156587	UBE2L6	3.97321	1.99031	3.09e-10	up
ENSG00000002587	HS3ST1	3.95866	1.98501	5.9e-13	up
ENSG00000173267	SNCG	3.9533	1.98306	2.34e-07	up
ENSG00000157111	TMEM171	3.93709	1.97713	8.5e-09	up
ENSG00000204381	LAYN	3.90575	1.9656	6.28e-06	up
ENSG00000239713	APOBEC3G	3.88291	1.95714	1.73e-05	up
ENSG00000228109	MELTF-AS1	3.86139	1.94912	0.000106357	up
ENSG00000165072	MAMDC2	3.85367	1.94623	6.14e-07	up
ENSG00000224897	POT1-AS1	3.83038	1.93749	0.00387072	up
ENSG00000262001	DLGAP1-AS2	3.81087	1.93012	0.000227584	up
ENSG00000137462	TLR2	3.8069	1.92862	4.54e-07	up
ENSG00000161921	CXCL16	3.80083	1.92631	1.26e-05	up
ENSG00000198959	TGM2	3.79056	1.92241	1.11e-05	up
ENSG00000056558	TRAF1	3.78405	1.91993	9.76e-07	up
ENSG00000102243	VGLL1	3.77832	1.91774	9.99e-07	up
ENSG00000101347	SAMHD1	3.76789	1.91376	5.62e-06	up
ENSG00000185947	ZNF267	3.7411	1.90346	2.37e-06	up
ENSG00000187775	DNAH17	3.68625	1.88215	0.000729886	up
ENSG00000136490	LIMD2	3.68369	1.88115	0.000838485	up
ENSG00000172183	ISG20	3.68018	1.87978	0.0037081	up
ENSG00000109255	NMU	3.67853	1.87913	1.06e-09	up
ENSG00000131650	KREMEN2	3.6454	1.86608	2.38e-06	up
ENSG00000115325	DOK1	3.64417	1.86559	0.0026748	up
ENSG00000119888	EPCAM	3.63389	1.86152	2.22e-08	up
ENSG00000125872	LRRN4	3.6265	1.85858	4.13e-05	up
ENSG00000215417	MIR17HG	3.52367	1.81708	0.000643464	up
ENSG00000204103	MAFB	3.51792	1.81472	0.00324321	up
ENSG00000175567	UCP2	3.50117	1.80784	2.93e-05	up
ENSG00000115009	CCL20	3.48789	1.80235	0.0028173	up
ENSG00000169908	TM4SF1	3.48587	1.80152	6.96e-09	up
ENSG00000089820	ARHGAP4	3.48072	1.79939	0.00154257	up
ENSG00000186088	GSAP	3.46879	1.79443	4.84e-05	up
ENSG00000138821	SLC39A8	3.4494	1.78634	0.000259855	up
ENSG00000006118	TMEM132A	3.44404	1.7841	5.32e-07	up
ENSG00000100625	SIX4	3.43603	1.78074	0.000238468	up
ENSG00000162757	C1orf74	3.43472	1.78019	4.91e-05	up
ENSG00000013588	GPRC5A	3.41671	1.77261	2.55e-07	up
ENSG00000259330	INAFM2	3.40048	1.76574	2.21e-05	up
ENSG00000224594	RPL29P19	3.39784	1.76462	0.00500567	up
ENSG00000124116	WFDC3	3.38291	1.75826	0.000229198	up
ENSG00000146232	NFKBIE	3.37069	1.75304	1.11e-06	up
ENSG00000165029	ABCA1	3.35567	1.7466	3.64e-05	up
ENSG00000253899	AC067904.2	3.35218	1.7451	0.0016252	up
ENSG00000180385	EMC3-AS1	3.33453	1.73748	4.36e-05	up
ENSG00000174792	ODAPH	3.30003	1.72248	0.000650682	up
ENSG00000130203	APOE	3.28155	1.71438	0.000133373	up
ENSG00000104856	RELB	3.27815	1.71288	0.000369998	up
ENSG00000155760	FZD7	3.26733	1.70811	9.71e-08	up
ENSG00000210191	MT-TL2	3.2591	1.70448	0.00263807	up
ENSG00000179598	PLD6	3.24867	1.69985	3.24e-05	up
ENSG00000101955	SRPX	3.24246	1.69709	0.00103553	up
ENSG00000122678	POLM	3.21343	1.68411	1.07e-06	up
ENSG00000115919	KYNU	3.17655	1.66746	0.000278316	up
ENSG00000147003	CLTRN	3.17554	1.667	0.000235795	up
ENSG00000229544	NKX1-2	3.1723	1.66553	3.34e-05	up
ENSG00000135519	KCNH3	3.17168	1.66525	4.79e-06	up
ENSG00000214019	AL034370.1	3.14818	1.65452	0.000862822	up
ENSG00000086696	HSD17B2	3.14454	1.65285	0.00205256	up
ENSG00000232838	PET117	3.13105	1.64665	2.66e-06	up
ENSG00000143067	ZNF697	3.11563	1.63953	7.54e-07	up
ENSG00000171310	CHST11	3.10361	1.63395	2.4e-05	up
ENSG00000088367	EPB41L1	3.09427	1.6296	4.22e-06	up
ENSG00000233328	PFN1P1	3.07402	1.62013	0.000211868	up
ENSG00000237523	LINC00857	3.02544	1.59714	0.000410064	up
ENSG00000154127	UBASH3B	3.02534	1.5971	1.46e-05	up
ENSG00000123427	EEF1AKMT3	3.00655	1.58811	2.05e-05	up
ENSG00000243789	JMJD7	2.98947	1.57989	4.16e-05	up
ENSG00000085662	AKR1B1	2.98621	1.57832	0.000307533	up
ENSG00000210164	MT-TG	2.96221	1.56667	0.00272065	up
ENSG00000123095	BHLHE41	2.95369	1.56252	1.66e-06	up
ENSG00000110047	EHD1	2.95016	1.5608	1.38e-14	up
ENSG00000189052	CGB5	2.92506	1.54847	0.000288127	up
ENSG00000112096	SOD2	2.91255	1.54228	0.00157136	up
ENSG00000008517	IL32	2.89194	1.53204	2.13e-10	up
ENSG00000234883	MIR155HG	2.89187	1.532	0.00173309	up
ENSG00000189320	FAM180A	2.88852	1.53033	7.13e-06	up
ENSG00000033170	FUT8	2.88168	1.52691	4.83e-07	up
ENSG00000198910	L1CAM	2.88048	1.52631	2.48e-05	up
ENSG00000240065	PSMB9	2.87769	1.52491	1.57e-05	up
ENSG00000006210	CX3CL1	2.87705	1.52459	0.00440362	up
ENSG00000092969	TGFB2	2.86038	1.51621	6.69e-05	up
ENSG00000117877	CD3EAP	2.83695	1.50434	0.00119341	up
ENSG00000198133	TMEM229B	2.8338	1.50274	0.000670622	up
ENSG00000119917	IFIT3	2.8299	1.50075	0.000771181	up
ENSG00000163874	ZC3H12A	2.8265	1.49901	4.45e-05	up
ENSG00000154978	VOPP1	2.82583	1.49867	5.43e-07	up
ENSG00000109861	CTSC	2.81192	1.49156	4.92e-07	up
ENSG00000171617	ENC1	2.8038	1.48738	0.000880803	up
ENSG00000165490	DDIAS	2.79104	1.4808	0.000122008	up
ENSG00000169604	ANTXR1	2.78772	1.47909	0.000456631	up
ENSG00000150967	ABCB9	2.77624	1.47313	0.000289926	up
ENSG00000055732	MCOLN3	2.76882	1.46927	0.000874923	up
ENSG00000170017	ALCAM	2.76843	1.46907	1.79e-05	up
ENSG00000149289	ZC3H12C	2.76656	1.46809	6.54e-05	up
ENSG00000082497	SERTAD4	2.75727	1.46324	5.25e-05	up
ENSG00000126561	STAT5A	2.74465	1.45662	0.000682502	up
ENSG00000108370	RGS9	2.74366	1.4561	0.000189554	up
ENSG00000213030	CGB8	2.73868	1.45348	1.15e-05	up
ENSG00000256128	LINC00944	2.73587	1.452	0.00162537	up
ENSG00000183742	MACC1	2.73392	1.45097	0.000114136	up
ENSG00000262049	AC139530.1	2.7318	1.44985	0.00256687	up
ENSG00000143322	ABL2	2.71166	1.43918	8.15e-05	up
ENSG00000182866	LCK	2.70777	1.43711	0.00096002	up
ENSG00000110031	LPXN	2.70768	1.43706	0.000329624	up
ENSG00000169902	TPST1	2.70678	1.43658	6.37e-07	up
ENSG00000228305	PRELID1P6	2.68693	1.42596	0.00126316	up
ENSG00000244462	RBM12	2.68363	1.42419	0.000526162	up
ENSG00000127423	AUNIP	2.67996	1.42221	0.00134959	up
ENSG00000166922	SCG5	2.679	1.4217	0.000299951	up
ENSG00000171914	TLN2	2.66611	1.41474	3.92e-07	up
ENSG00000142173	COL6A2	2.66373	1.41345	0.000475508	up
ENSG00000185187	SIGIRR	2.65407	1.4082	0.0020284	up
ENSG00000054219	LY75	2.6508	1.40643	0.00445425	up
ENSG00000271447	MMP28	2.65034	1.40618	0.00164203	up
ENSG00000141753	IGFBP4	2.64965	1.4058	0.000342621	up
ENSG00000170454	KRT75	2.6436	1.40251	7.79e-05	up
ENSG00000258749	AL110504.1	2.64267	1.402	0.00148142	up
ENSG00000131094	C1QL1	2.63681	1.3988	0.00270056	up
ENSG00000089327	FXYD5	2.61354	1.38601	5.47e-07	up
ENSG00000272455	MRPL20-DT	2.61038	1.38426	0.000212195	up
ENSG00000156804	FBXO32	2.60594	1.38181	0.000794612	up
ENSG00000113070	HBEGF	2.60565	1.38164	0.000532051	up
ENSG00000127564	PKMYT1	2.59559	1.37606	8.27e-06	up
ENSG00000130775	THEMIS2	2.58807	1.37188	0.00081504	up
ENSG00000058056	USP13	2.58697	1.37126	1.29e-07	up
ENSG00000115828	QPCT	2.58579	1.3706	0.00143287	up
ENSG00000134531	EMP1	2.58519	1.37027	0.000585228	up
ENSG00000115221	ITGB6	2.57066	1.36214	4.67e-05	up
ENSG00000163171	CDC42EP3	2.56444	1.35864	8.03e-05	up
ENSG00000255529	POLR2M	2.55675	1.35431	3.5e-05	up
ENSG00000264772	AC016876.3	2.55376	1.35262	0.000994946	up
ENSG00000181026	AEN	2.54993	1.35046	5.87e-06	up
ENSG00000144749	LRIG1	2.54632	1.34841	8.57e-06	up
ENSG00000221963	APOL6	2.5426	1.3463	2.37e-06	up
ENSG00000138678	GPAT3	2.53566	1.34236	5.18e-06	up
ENSG00000118503	TNFAIP3	2.53196	1.34025	0.000565137	up
ENSG00000170961	HAS2	2.52807	1.33804	0.00105264	up
ENSG00000198830	HMGN2	2.52447	1.33598	0.000340264	up
ENSG00000067221	STOML1	2.50213	1.32316	0.000372613	up
ENSG00000167549	CORO6	2.50053	1.32224	8.23e-06	up
ENSG00000122641	INHBA	2.49883	1.32125	0.000567492	up
ENSG00000057019	DCBLD2	2.4877	1.31481	3.5e-09	up
ENSG00000197989	SNHG12	2.48672	1.31425	0.000115053	up
ENSG00000049759	NEDD4L	2.47089	1.30503	1.33e-07	up
ENSG00000085276	MECOM	2.4653	1.30176	9.07e-05	up
ENSG00000138311	ZNF365	2.46383	1.3009	4.92e-05	up
ENSG00000155034	FBXL18	2.46261	1.30019	0.00145731	up
ENSG00000111057	KRT18	2.46043	1.29891	2.67e-05	up
ENSG00000272269	AL138724.1	2.45565	1.2961	0.00236538	up
ENSG00000159216	RUNX1	2.45186	1.29388	7.94e-06	up
ENSG00000139278	GLIPR1	2.44205	1.28809	6.07e-06	up
ENSG00000172965	MIR4435-2HG	2.44023	1.28702	0.00061638	up
ENSG00000143507	DUSP10	2.43738	1.28533	0.00170228	up
ENSG00000110446	SLC15A3	2.42867	1.28016	0.00377224	up
ENSG00000111348	ARHGDIB	2.42707	1.27921	0.0004362	up
ENSG00000205352	PRR13	2.41985	1.27492	0.000135	up
ENSG00000138675	FGF5	2.41839	1.27405	0.00118892	up
ENSG00000077942	FBLN1	2.40976	1.26889	0.00137173	up
ENSG00000133321	PLAAT4	2.40813	1.26792	0.00186422	up
ENSG00000177822	TENM3-AS1	2.40613	1.26671	0.00339863	up
ENSG00000102879	CORO1A	2.40182	1.26413	0.000670259	up
ENSG00000204516	MICB	2.40085	1.26354	9.06e-05	up
ENSG00000151651	ADAM8	2.40034	1.26324	9.82e-07	up
ENSG00000135048	CEMIP2	2.39965	1.26282	0.000729703	up
ENSG00000011422	PLAUR	2.38232	1.25236	2.51e-06	up
ENSG00000137124	ALDH1B1	2.37232	1.2463	6.47e-05	up
ENSG00000117519	CNN3	2.36721	1.24319	1.44e-07	up
ENSG00000099282	TSPAN15	2.36422	1.24137	0.000196512	up
ENSG00000101224	CDC25B	2.36397	1.24121	0.000164964	up
ENSG00000156639	ZFAND3	2.36375	1.24108	7.71e-08	up
ENSG00000110092	CCND1	2.3594	1.23842	1.98e-06	up
ENSG00000261373	VPS9D1-AS1	2.35789	1.2375	0.00114115	up
ENSG00000091651	ORC6	2.35275	1.23435	0.000529749	up
ENSG00000137821	LRRC49	2.35071	1.2331	0.000397162	up
ENSG00000117569	PTBP2	2.34633	1.2304	0.00193236	up
ENSG00000137331	IER3	2.34564	1.22998	0.000747383	up
ENSG00000142871	CCN1	2.34238	1.22797	0.000680401	up
ENSG00000140931	CMTM3	2.32588	1.21778	0.0044041	up
ENSG00000188130	MAPK12	2.32478	1.21709	0.00171103	up
ENSG00000065809	FAM107B	2.3207	1.21456	0.000182589	up
ENSG00000117069	ST6GALNAC5	2.31709	1.21231	0.0022289	up
ENSG00000126249	PDCD2L	2.31356	1.21012	6.41e-05	up
ENSG00000103187	COTL1	2.31313	1.20985	5.28e-06	up
ENSG00000166289	PLEKHF1	2.3092	1.20739	0.000216573	up
ENSG00000035862	TIMP2	2.30883	1.20716	8.36e-05	up
ENSG00000112149	CD83	2.30816	1.20674	0.000241053	up
ENSG00000158062	UBXN11	2.30686	1.20593	0.00115989	up
ENSG00000277443	MARCKS	2.30077	1.20212	4.94e-06	up
ENSG00000097021	ACOT7	2.29061	1.19573	0.000121111	up
ENSG00000175602	CCDC85B	2.28796	1.19406	3.06e-07	up
ENSG00000258947	TUBB3	2.2813	1.18986	0.000838201	up
ENSG00000135124	P2RX4	2.28027	1.1892	6.1e-05	up
ENSG00000175592	FOSL1	2.27491	1.18581	0.00350634	up
ENSG00000133119	RFC3	2.27339	1.18485	0.000541163	up
ENSG00000111206	FOXM1	2.2634	1.17849	0.000944984	up
ENSG00000166750	SLFN5	2.25654	1.17411	0.00266649	up
ENSG00000125618	PAX8	2.25279	1.17171	0.00202089	up
ENSG00000165801	ARHGEF40	2.24675	1.16784	0.00193301	up
ENSG00000167747	C19orf48	2.24226	1.16495	4.25e-05	up
ENSG00000014138	POLA2	2.23976	1.16335	0.000135244	up
ENSG00000055483	USP36	2.2379	1.16215	0.00197799	up
ENSG00000175315	CST6	2.21703	1.14863	0.00462205	up
ENSG00000025772	TOMM34	2.21686	1.14852	3.64e-05	up
ENSG00000122861	PLAU	2.21357	1.14637	8.97e-06	up
ENSG00000203668	CHML	2.20923	1.14354	0.000987276	up
ENSG00000124225	PMEPA1	2.20065	1.13793	0.000288118	up
ENSG00000015475	BID	2.19834	1.13641	0.000152494	up
ENSG00000139289	PHLDA1	2.1957	1.13468	0.00080238	up
ENSG00000102870	ZNF629	2.19148	1.1319	0.0029891	up
ENSG00000115363	EVA1A	2.18917	1.13039	0.00299633	up
ENSG00000197632	SERPINB2	2.18892	1.13022	3.39e-05	up
ENSG00000171574	ZNF584	2.18504	1.12766	0.000682529	up
ENSG00000167173	C15orf39	2.17308	1.11974	0.00189966	up
ENSG00000281181	FP236383.5	2.16677	1.11555	0.000858894	up
ENSG00000132773	TOE1	2.16193	1.11232	0.000589597	up
ENSG00000203993	ARRDC1-AS1	2.16164	1.11212	0.00144917	up
ENSG00000180008	SOCS4	2.15932	1.11058	0.00430375	up
ENSG00000175334	BANF1	2.15863	1.11012	0.00237471	up
ENSG00000280614	FP236383.4	2.14521	1.10112	0.00105951	up
ENSG00000280800	FP671120.6	2.13772	1.09607	0.00105712	up
ENSG00000086712	TXLNG	2.13484	1.09413	0.00229568	up
ENSG00000132386	SERPINF1	2.1339	1.09349	0.0020396	up
ENSG00000164045	CDC25A	2.13337	1.09314	2.24e-06	up
ENSG00000244509	APOBEC3C	2.13274	1.09271	0.000151079	up
ENSG00000173402	DAG1	2.12567	1.08792	0.000108482	up
ENSG00000143653	SCCPDH	2.11876	1.08322	0.000728527	up
ENSG00000100650	SRSF5	2.11421	1.08012	0.000453558	up
ENSG00000281383	FP671120.7	2.11394	1.07993	0.00158447	up
ENSG00000142156	COL6A1	2.11046	1.07756	0.000184904	up
ENSG00000166851	PLK1	2.11033	1.07747	0.000212767	up
ENSG00000258017	AC011603.3	2.10266	1.07221	3.95e-05	up
ENSG00000104524	PYCR3	2.09567	1.06741	0.00289917	up
ENSG00000162413	KLHL21	2.08992	1.06345	0.000266645	up
ENSG00000181938	GINS3	2.08777	1.06196	3.27e-05	up
ENSG00000077150	NFKB2	2.08629	1.06094	4.35e-05	up
ENSG00000134809	TIMM10	2.08384	1.05925	0.000646427	up
ENSG00000164692	COL1A2	2.08028	1.05678	1.38e-05	up
ENSG00000260916	CCPG1	2.07678	1.05435	0.00261806	up
ENSG00000127586	CHTF18	2.07548	1.05345	0.000202633	up
ENSG00000138772	ANXA3	2.07428	1.05261	2.55e-05	up
ENSG00000140519	RHCG	2.07288	1.05164	0.000594638	up
ENSG00000163347	CLDN1	2.07247	1.05135	0.000139113	up
ENSG00000196422	PPP1R26	2.07061	1.05006	0.00222518	up
ENSG00000169136	ATF5	2.07016	1.04974	7.15e-05	up
ENSG00000164949	GEM	2.06952	1.0493	0.00142255	up
ENSG00000044446	PHKA2	2.06903	1.04895	0.000576761	up
ENSG00000160050	CCDC28B	2.06776	1.04807	0.00295184	up
ENSG00000151748	SAV1	2.06445	1.04575	1.56e-05	up
ENSG00000101412	E2F1	2.06191	1.04398	0.00152352	up
ENSG00000111696	NT5DC3	2.05614	1.03994	0.000226127	up
ENSG00000128050	PAICS	2.0544	1.03871	0.000860319	up
ENSG00000163257	DCAF16	2.047	1.03351	0.00409783	up
ENSG00000166897	ELFN2	2.04688	1.03343	0.000986627	up
ENSG00000100379	KCTD17	2.0429	1.03062	0.000806796	up
ENSG00000156853	ZNF689	2.03881	1.02772	0.00218165	up
ENSG00000121753	ADGRB2	2.03761	1.02688	0.00193224	up
ENSG00000041982	TNC	2.03715	1.02655	0.0001285	up
ENSG00000279392	AL158801.5	2.03698	1.02643	0.00126905	up
ENSG00000102226	USP11	2.03696	1.02641	0.00200776	up
ENSG00000113758	DBN1	2.03575	1.02556	0.0011512	up
ENSG00000172936	MYD88	2.0356	1.02546	2.52e-08	up
ENSG00000170175	CHRNB1	2.03239	1.02318	7.24e-05	up
ENSG00000062582	MRPS24	2.02846	1.02039	0.000269604	up
ENSG00000152229	PSTPIP2	2.02663	1.01908	0.000352793	up
ENSG00000125347	IRF1	2.02283	1.01638	0.00289287	up
ENSG00000102312	PORCN	2.01827	1.01312	0.00352063	up
ENSG00000123096	SSPN	2.00731	1.00527	0.00243332	up
ENSG00000175063	UBE2C	2.00673	1.00485	6.15e-07	up
ENSG00000181381	DDX60L	2.00461	1.00332	0.000253991	up
ENSG00000106733	NMRK1	0.499398	-1.00174	7.95e-06	down
ENSG00000188613	NANOS1	0.497952	-1.00592	0.00100957	down
ENSG00000179388	EGR3	0.497882	-1.00612	3.11e-05	down
ENSG00000099204	ABLIM1	0.496055	-1.01143	0.00014547	down
ENSG00000113916	BCL6	0.495182	-1.01397	5.47e-05	down
ENSG00000110852	CLEC2B	0.495152	-1.01406	0.000243057	down
ENSG00000231890	DARS-AS1	0.493699	-1.0183	0.00212871	down
ENSG00000089723	OTUB2	0.493674	-1.01837	1.75e-05	down
ENSG00000168743	NPNT	0.492551	-1.02165	0.00128161	down
ENSG00000065361	ERBB3	0.492104	-1.02297	2.62e-07	down
ENSG00000108244	KRT23	0.491818	-1.0238	2.92e-06	down
ENSG00000162980	ARL5A	0.491112	-1.02588	1.01e-08	down
ENSG00000128422	KRT17	0.49091	-1.02647	8.76e-05	down
ENSG00000105808	RASA4	0.489125	-1.03173	0.00180561	down
ENSG00000119411	BSPRY	0.488568	-1.03337	0.000748855	down
ENSG00000068024	HDAC4	0.488388	-1.0339	9.79e-08	down
ENSG00000074855	ANO8	0.488349	-1.03401	4.98e-05	down
ENSG00000148344	PTGES	0.487636	-1.03612	7.67e-08	down
ENSG00000135709	KIAA0513	0.486403	-1.03978	1.59e-05	down
ENSG00000115084	SLC35F5	0.4864	-1.03979	0.00107023	down
ENSG00000172819	RARG	0.486376	-1.03986	0.00117544	down
ENSG00000136697	IL1F10	0.485216	-1.0433	0.000563128	down
ENSG00000186081	KRT5	0.484579	-1.0452	2.03e-05	down
ENSG00000183578	TNFAIP8L3	0.48449	-1.04546	2.29e-07	down
ENSG00000134215	VAV3	0.483577	-1.04818	2.76e-05	down
ENSG00000164096	C4orf3	0.482159	-1.05242	2.6e-07	down
ENSG00000172081	MOB3A	0.481434	-1.05459	2.18e-05	down
ENSG00000169851	PCDH7	0.480425	-1.05762	1.2e-08	down
ENSG00000172818	OVOL1	0.480099	-1.0586	0.000166461	down
ENSG00000282304	AC140479.4	0.479363	-1.06081	1.74e-06	down
ENSG00000011347	SYT7	0.479134	-1.0615	5.98e-10	down
ENSG00000165272	AQP3	0.478361	-1.06383	0.000350413	down
ENSG00000182871	COL18A1	0.477678	-1.06589	5.22e-07	down
ENSG00000142677	IL22RA1	0.473081	-1.07984	3.99e-07	down
ENSG00000106278	PTPRZ1	0.471516	-1.08462	2.66e-06	down
ENSG00000167757	KLK11	0.470464	-1.08784	3.1e-06	down
ENSG00000144445	KANSL1L	0.469136	-1.09192	0.000326612	down
ENSG00000255508	AP002990.1	0.468625	-1.09349	0.00105527	down
ENSG00000169469	SPRR1B	0.468456	-1.09401	8.2e-06	down
ENSG00000184564	SLITRK6	0.467917	-1.09568	3.98e-07	down
ENSG00000125845	BMP2	0.465929	-1.10182	7.81e-07	down
ENSG00000183049	CAMK1D	0.465196	-1.10409	0.00268447	down
ENSG00000171476	HOPX	0.464223	-1.10711	0.000103894	down
ENSG00000103145	HCFC1R1	0.463875	-1.10819	0.0034999	down
ENSG00000185100	ADSS1	0.463575	-1.10912	0.000720401	down
ENSG00000101230	ISM1	0.463323	-1.10991	4.29e-07	down
ENSG00000143882	ATP6V1C2	0.462772	-1.11163	6.79e-07	down
ENSG00000170426	SDR9C7	0.462493	-1.1125	2.55e-05	down
ENSG00000168675	LDLRAD4	0.460891	-1.1175	0.00239147	down
ENSG00000137747	TMPRSS13	0.460747	-1.11795	4.35e-07	down
ENSG00000180667	YOD1	0.460522	-1.11866	8.33e-07	down
ENSG00000186918	ZNF395	0.458801	-1.12406	5.06e-06	down
ENSG00000204539	CDSN	0.458035	-1.12647	1.5e-06	down
ENSG00000146242	TPBG	0.45702	-1.12967	1.96e-05	down
ENSG00000187134	AKR1C1	0.456648	-1.13084	2.42e-05	down
ENSG00000074211	PPP2R2C	0.454854	-1.13653	0.000301896	down
ENSG00000146054	TRIM7	0.454317	-1.13823	4.05e-05	down
ENSG00000114023	FAM162A	0.454233	-1.1385	6.68e-06	down
ENSG00000184678	H2BC21	0.453812	-1.13983	4.56e-06	down
ENSG00000167377	ZNF23	0.453291	-1.14149	0.00411144	down
ENSG00000134824	FADS2	0.45113	-1.14839	0.00011032	down
ENSG00000105131	EPHX3	0.451121	-1.14841	1.75e-07	down
ENSG00000165288	BRWD3	0.450199	-1.15137	1.1e-05	down
ENSG00000111319	SCNN1A	0.450103	-1.15167	0.000331088	down
ENSG00000154065	ANKRD29	0.450032	-1.1519	5.64e-07	down
ENSG00000135932	CAB39	0.449418	-1.15387	0.000780119	down
ENSG00000150556	LYPD6B	0.446983	-1.16171	0.000690764	down
ENSG00000146233	CYP39A1	0.446188	-1.16428	0.000433457	down
ENSG00000197461	PDGFA	0.444792	-1.1688	0.000392578	down
ENSG00000144452	ABCA12	0.444557	-1.16956	5.14e-06	down
ENSG00000129757	CDKN1C	0.444203	-1.17071	0.00115748	down
ENSG00000176171	BNIP3	0.442974	-1.1747	1.06e-06	down
ENSG00000147789	ZNF7	0.44268	-1.17566	1.42e-09	down
ENSG00000154639	CXADR	0.441885	-1.17826	0.00402993	down
ENSG00000146350	TBC1D32	0.441252	-1.18033	1.97e-06	down
ENSG00000181449	SOX2	0.440901	-1.18147	0.000718089	down
ENSG00000169474	SPRR1A	0.440665	-1.18225	1.64e-07	down
ENSG00000181458	TMEM45A	0.440536	-1.18267	8.13e-12	down
ENSG00000074410	CA12	0.439908	-1.18473	0.00264639	down
ENSG00000262454	MIR193BHG	0.439569	-1.18584	2.26e-07	down
ENSG00000111405	ENDOU	0.436981	-1.19436	1.24e-05	down
ENSG00000143753	DEGS1	0.436793	-1.19498	0.00204215	down
ENSG00000072201	LNX1	0.435947	-1.19778	0.000270611	down
ENSG00000165474	GJB2	0.435607	-1.1989	9.17e-07	down
ENSG00000198483	ANKRD35	0.435472	-1.19935	0.000133575	down
ENSG00000182359	KBTBD3	0.433135	-1.20711	0.000321771	down
ENSG00000188001	TPRG1	0.432208	-1.2102	9.34e-09	down
ENSG00000185761	ADAMTSL5	0.431646	-1.21208	0.00013555	down
ENSG00000171462	DLK2	0.431124	-1.21382	3.72e-06	down
ENSG00000133056	PIK3C2B	0.430271	-1.21668	0.000561292	down
ENSG00000189001	SBSN	0.42946	-1.21941	8.91e-11	down
ENSG00000070731	ST6GALNAC2	0.429013	-1.22091	4.09e-07	down
ENSG00000137975	CLCA2	0.427909	-1.22462	5.12e-06	down
ENSG00000160223	ICOSLG	0.427567	-1.22578	0.00120444	down
ENSG00000135926	TMBIM1	0.426824	-1.22829	0.00455901	down
ENSG00000101460	MAP1LC3A	0.426479	-1.22945	0.000223985	down
ENSG00000164414	SLC35A1	0.423508	-1.23954	2.12e-05	down
ENSG00000160712	IL6R	0.42236	-1.24346	0.00110528	down
ENSG00000108352	RAPGEFL1	0.421494	-1.24642	0.00364787	down
ENSG00000170465	KRT6C	0.418977	-1.25506	1.29e-06	down
ENSG00000119950	MXI1	0.415422	-1.26735	0.00305134	down
ENSG00000162813	BPNT1	0.414507	-1.27053	2.23e-07	down
ENSG00000163221	S100A12	0.413618	-1.27363	7.49e-08	down
ENSG00000103485	QPRT	0.413586	-1.27374	1.71e-10	down
ENSG00000075426	FOSL2	0.412812	-1.27644	4.18e-10	down
ENSG00000186806	VSIG10L	0.411823	-1.2799	7.73e-08	down
ENSG00000203785	SPRR2E	0.411723	-1.28025	1.78e-08	down
ENSG00000078900	TP73	0.411522	-1.28096	4.72e-08	down
ENSG00000168447	SCNN1B	0.410745	-1.28368	1.73e-06	down
ENSG00000137414	FAM8A1	0.410543	-1.2844	8.56e-12	down
ENSG00000179859	RNF227	0.410214	-1.28555	1.12e-05	down
ENSG00000183671	GPR1	0.409975	-1.28639	4.52e-05	down
ENSG00000177885	GRB2	0.409899	-1.28666	0.000156951	down
ENSG00000139428	MMAB	0.409517	-1.288	0.00115241	down
ENSG00000186832	KRT16	0.408911	-1.29014	1.01e-05	down
ENSG00000178573	MAF	0.406994	-1.29692	6.84e-07	down
ENSG00000101188	NTSR1	0.406586	-1.29837	0.00040729	down
ENSG00000166033	HTRA1	0.40635	-1.2992	3.9e-05	down
ENSG00000166265	CYYR1	0.404701	-1.30507	0.000180578	down
ENSG00000243708	PLA2G4B	0.404205	-1.30684	0.000434806	down
ENSG00000159388	BTG2	0.402336	-1.31353	3.94e-05	down
ENSG00000074181	NOTCH3	0.402112	-1.31433	4.89e-06	down
ENSG00000143995	MEIS1	0.400303	-1.32084	1.66e-08	down
ENSG00000198598	MMP17	0.399864	-1.32242	1.94e-06	down
ENSG00000108479	GALK1	0.397454	-1.33114	2.8e-06	down
ENSG00000164070	HSPA4L	0.396549	-1.33443	1.48e-05	down
ENSG00000163686	ABHD6	0.393927	-1.344	0.000645535	down
ENSG00000172345	STARD5	0.393755	-1.34463	1.33e-05	down
ENSG00000066629	EML1	0.391784	-1.35187	9.43e-06	down
ENSG00000069849	ATP1B3	0.390495	-1.35662	4.95e-05	down
ENSG00000006016	CRLF1	0.38904	-1.36201	0.00456038	down
ENSG00000205213	LGR4	0.388558	-1.3638	0.00019206	down
ENSG00000175121	WFDC5	0.388491	-1.36405	3.3e-07	down
ENSG00000122378	PRXL2A	0.388191	-1.36516	0.000166779	down
ENSG00000115457	IGFBP2	0.387815	-1.36656	0.000207077	down
ENSG00000230088	KRT16P5	0.387212	-1.3688	0.00194236	down
ENSG00000283227	SPRR5	0.386924	-1.36988	1.1e-06	down
ENSG00000188089	PLA2G4E	0.385188	-1.37636	4.26e-09	down
ENSG00000198643	FAM3D	0.383835	-1.38144	0.00145298	down
ENSG00000159527	PGLYRP3	0.381436	-1.39049	2.34e-05	down
ENSG00000164938	TP53INP1	0.381293	-1.39103	4.83e-07	down
ENSG00000205076	LGALS7	0.379946	-1.39613	0.000604945	down
ENSG00000169752	NRG4	0.37972	-1.39699	3.29e-05	down
ENSG00000253313	C1orf210	0.37928	-1.39867	6.37e-05	down
ENSG00000151468	CCDC3	0.377913	-1.40387	1.04e-05	down
ENSG00000181690	PLAG1	0.377373	-1.40594	0.000137933	down
ENSG00000099194	SCD	0.376654	-1.40869	7.28e-06	down
ENSG00000130427	EPO	0.376623	-1.40881	0.00197329	down
ENSG00000066427	ATXN3	0.376399	-1.40967	2.68e-05	down
ENSG00000149809	TM7SF2	0.375576	-1.41282	1.76e-05	down
ENSG00000154227	CERS3	0.37501	-1.415	0.000322901	down
ENSG00000265401	AC093484.3	0.373843	-1.4195	0.00299032	down
ENSG00000165312	OTUD1	0.373535	-1.42068	4.81e-05	down
ENSG00000099875	MKNK2	0.373071	-1.42248	7.51e-09	down
ENSG00000215853	RPTN	0.372924	-1.42305	0.000405718	down
ENSG00000161249	DMKN	0.372568	-1.42442	4.05e-18	down
ENSG00000132746	ALDH3B2	0.371471	-1.42868	4.26e-10	down
ENSG00000243284	VSIG8	0.370212	-1.43358	0.00189875	down
ENSG00000106819	ASPN	0.370126	-1.43391	0.00044346	down
ENSG00000140263	SORD	0.370026	-1.4343	1.32e-08	down
ENSG00000269855	RNF225	0.368298	-1.44106	0.00129781	down
ENSG00000267520	AC010733.1	0.36595	-1.45028	0.000127497	down
ENSG00000068078	FGFR3	0.365246	-1.45306	1.36e-05	down
ENSG00000171916	LGALS9C	0.365014	-1.45398	0.000262785	down
ENSG00000183479	TREX2	0.363386	-1.46043	1.08e-06	down
ENSG00000121552	CSTA	0.360663	-1.47127	6.93e-06	down
ENSG00000198835	GJC2	0.359545	-1.47575	9.97e-05	down
ENSG00000197353	LYPD2	0.3592	-1.47714	6.7e-06	down
ENSG00000158055	GRHL3	0.358661	-1.47931	4.78e-06	down
ENSG00000073282	TP63	0.358346	-1.48057	6.87e-09	down
ENSG00000168824	NSG1	0.358061	-1.48172	1.19e-06	down
ENSG00000119862	LGALSL	0.357952	-1.48216	7.48e-09	down
ENSG00000243660	ZNF487	0.357212	-1.48515	6.8e-05	down
ENSG00000151715	TMEM45B	0.355859	-1.49062	2.49e-07	down
ENSG00000159733	ZFYVE28	0.355524	-1.49198	0.000970952	down
ENSG00000084110	HAL	0.354799	-1.49493	1.18e-06	down
ENSG00000152661	GJA1	0.354558	-1.49591	8.09e-06	down
ENSG00000173727	AP000769.1	0.353023	-1.50216	0.000283943	down
ENSG00000172824	CES4A	0.352449	-1.50451	0.000433658	down
ENSG00000136695	IL36RN	0.351421	-1.50873	1.57e-07	down
ENSG00000173221	GLRX	0.349428	-1.51693	2.58e-11	down
ENSG00000206073	SERPINB4	0.349158	-1.51805	0.00083439	down
ENSG00000167759	KLK13	0.348977	-1.5188	3.01e-06	down
ENSG00000159399	HK2	0.348735	-1.5198	6.2e-13	down
ENSG00000279806	AC018629.1	0.348606	-1.52033	8.19e-07	down
ENSG00000150593	PDCD4	0.347944	-1.52307	0.000162015	down
ENSG00000185112	FAM43A	0.346242	-1.53015	8.67e-13	down
ENSG00000162616	DNAJB4	0.345917	-1.5315	2.69e-06	down
ENSG00000158158	CNNM4	0.345262	-1.53424	8.78e-07	down
ENSG00000119938	PPP1R3C	0.345091	-1.53495	7.08e-15	down
ENSG00000223573	TINCR	0.344757	-1.53635	3.88e-07	down
ENSG00000153246	PLA2R1	0.34243	-1.54612	1.89e-20	down
ENSG00000184148	SPRR4	0.342075	-1.54761	1.41e-08	down
ENSG00000204538	PSORS1C2	0.341371	-1.55059	0.000227081	down
ENSG00000116497	S100PBP	0.340368	-1.55483	2.52e-28	down
ENSG00000148926	ADM	0.340165	-1.55569	2.5e-05	down
ENSG00000120129	DUSP1	0.340094	-1.55599	5.64e-14	down
ENSG00000170423	KRT78	0.336778	-1.57013	3.94e-09	down
ENSG00000204866	IGFL2	0.333185	-1.5856	6.26e-08	down
ENSG00000166046	TCP11L2	0.33084	-1.5958	2.56e-06	down
ENSG00000188277	C15orf62	0.328213	-1.6073	2.32e-06	down
ENSG00000092295	TGM1	0.326001	-1.61705	3.8e-07	down
ENSG00000053108	FSTL4	0.324928	-1.62181	3e-11	down
ENSG00000170899	GSTA4	0.324896	-1.62195	4.21e-09	down
ENSG00000146038	DCDC2	0.323526	-1.62805	9.24e-09	down
ENSG00000123933	MXD4	0.322476	-1.63274	4.17e-10	down
ENSG00000173926	MARCHF3	0.322457	-1.63282	2.71e-06	down
ENSG00000170298	LGALS9B	0.32063	-1.64102	4.35e-06	down
ENSG00000146278	PNRC1	0.320278	-1.64261	8.59e-09	down
ENSG00000154856	APCDD1	0.319007	-1.64834	9.17e-11	down
ENSG00000163209	SPRR3	0.318832	-1.64913	0.000164901	down
ENSG00000100033	PRODH	0.318688	-1.64978	4.16e-09	down
ENSG00000169174	PCSK9	0.316726	-1.65869	5.98e-06	down
ENSG00000163328	GPR155	0.313492	-1.6735	2.34e-09	down
ENSG00000221869	CEBPD	0.313302	-1.67438	1.69e-11	down
ENSG00000149212	SESN3	0.312973	-1.67589	3.26e-05	down
ENSG00000143412	ANXA9	0.312467	-1.67822	0.000251075	down
ENSG00000196139	AKR1C3	0.311844	-1.6811	1.76e-06	down
ENSG00000075673	ATP12A	0.311747	-1.68155	4.77e-07	down
ENSG00000117394	SLC2A1	0.3117	-1.68177	1.33e-08	down
ENSG00000189051	RNF222	0.311665	-1.68193	2.41e-09	down
ENSG00000141579	ZNF750	0.311419	-1.68307	1.88e-08	down
ENSG00000236740	AL033384.1	0.309439	-1.69227	5.78e-07	down
ENSG00000224689	ZNF812P	0.309152	-1.69361	0.00149867	down
ENSG00000232855	AF165147.1	0.308417	-1.69705	4.1e-05	down
ENSG00000167914	GSDMA	0.305787	-1.7094	9.73e-13	down
ENSG00000186474	KLK12	0.303458	-1.72043	4.15e-05	down
ENSG00000144476	ACKR3	0.300711	-1.73355	8.66e-13	down
ENSG00000183760	ACP7	0.298663	-1.74341	5.97e-05	down
ENSG00000230102	LINC02028	0.297121	-1.75088	1.4e-06	down
ENSG00000172594	SMPDL3A	0.29651	-1.75385	2.91e-06	down
ENSG00000243550	LINC01214	0.293689	-1.76764	0.000110192	down
ENSG00000168907	PLA2G4F	0.29305	-1.77078	3.05e-05	down
ENSG00000135218	CD36	0.289536	-1.78819	8.4e-08	down
ENSG00000179477	ALOX12B	0.289453	-1.7886	6.04e-10	down
ENSG00000196542	SPTSSB	0.289168	-1.79002	1.24e-05	down
ENSG00000064195	DLX3	0.288809	-1.79181	5.86e-07	down
ENSG00000151632	AKR1C2	0.288408	-1.79382	2.15e-08	down
ENSG00000145879	SPINK7	0.288314	-1.79429	1.1e-05	down
ENSG00000139988	RDH12	0.285376	-1.80907	5.52e-06	down
ENSG00000185668	POU3F1	0.285055	-1.81069	1.38e-07	down
ENSG00000116990	MYCL	0.284958	-1.81118	2.29e-06	down
ENSG00000148600	CDHR1	0.284949	-1.81122	2.33e-08	down
ENSG00000159871	LYPD5	0.283035	-1.82095	1.91e-10	down
ENSG00000104419	NDRG1	0.278793	-1.84273	2.83e-11	down
ENSG00000121742	GJB6	0.278386	-1.84484	2.14e-09	down
ENSG00000165794	SLC39A2	0.276429	-1.85502	8.68e-10	down
ENSG00000088386	SLC15A1	0.276235	-1.85603	8.99e-15	down
ENSG00000159713	TPPP3	0.272386	-1.87628	6.53e-05	down
ENSG00000229526	KRT16P4	0.269364	-1.89237	3.4e-08	down
ENSG00000256812	CAPNS2	0.268843	-1.89517	9.25e-07	down
ENSG00000164181	ELOVL7	0.267636	-1.90166	1.11e-06	down
ENSG00000186844	LCE1A	0.267537	-1.90219	2.41e-14	down
ENSG00000076770	MBNL3	0.266341	-1.90866	4.65e-16	down
ENSG00000103056	SMPD3	0.266021	-1.91039	5.49e-07	down
ENSG00000178597	PSAPL1	0.264356	-1.91944	5.98e-19	down
ENSG00000130055	GDPD2	0.264255	-1.92	0.000221572	down
ENSG00000187223	LCE2D	0.263633	-1.9234	2.1e-10	down
ENSG00000138764	CCNG2	0.256546	-1.96271	7.55e-15	down
ENSG00000095585	BLNK	0.255269	-1.96991	3.03e-07	down
ENSG00000133710	SPINK5	0.251417	-1.99184	1.98e-14	down
ENSG00000283992	SLURP2	0.251384	-1.99203	4.47e-08	down
ENSG00000246273	SBF2-AS1	0.250586	-1.99662	5.38e-05	down
ENSG00000178776	C5orf46	0.250202	-1.99884	0.00237104	down
ENSG00000188508	KRTDAP	0.249685	-2.00182	4.34e-14	down
ENSG00000160862	AZGP1	0.248869	-2.00654	2.42e-17	down
ENSG00000187180	LCE2C	0.248057	-2.01126	5.35e-14	down
ENSG00000105141	CASP14	0.245315	-2.02729	5.74e-13	down
ENSG00000204618	RNF39	0.244475	-2.03224	1.95e-24	down
ENSG00000182938	OTOP3	0.243575	-2.03756	4.41e-06	down
ENSG00000182492	BGN	0.242776	-2.0423	1.46e-05	down
ENSG00000108602	ALDH3A1	0.240699	-2.0547	5.21e-07	down
ENSG00000196734	LCE1B	0.239894	-2.05953	3.82e-08	down
ENSG00000118194	TNNT2	0.238605	-2.0673	8.29e-10	down
ENSG00000129521	EGLN3	0.238523	-2.0678	1.12e-10	down
ENSG00000214856	KRT16P1	0.230785	-2.11538	9.98e-10	down
ENSG00000205221	VIT	0.22986	-2.12117	3.31e-09	down
ENSG00000204389	HSPA1A	0.228796	-2.12786	0.0043936	down
ENSG00000104055	TGM5	0.227754	-2.13445	1.56e-12	down
ENSG00000240386	LCE1F	0.22594	-2.14599	3.02e-11	down
ENSG00000204421	LY6G6C	0.225321	-2.14995	9.38e-09	down
ENSG00000204020	LIPN	0.224177	-2.15729	0.000514349	down
ENSG00000159516	SPRR2G	0.220952	-2.17819	6.62e-14	down
ENSG00000187173	LCE2A	0.219454	-2.18801	1.56e-17	down
ENSG00000186226	LCE1E	0.218007	-2.19755	2.33e-10	down
ENSG00000121316	PLBD1	0.215983	-2.21101	5.91e-12	down
ENSG00000168350	DEGS2	0.21573	-2.2127	9.99e-08	down
ENSG00000184459	BPIFC	0.215381	-2.21504	4.86e-10	down
ENSG00000118520	ARG1	0.215255	-2.21588	1.12e-05	down
ENSG00000257529	RPL36A-HNRNPH2	0.213272	-2.22923	1.57e-07	down
ENSG00000119686	FLVCR2	0.2126	-2.23379	1.84e-12	down
ENSG00000162552	WNT4	0.210669	-2.24695	1.69e-07	down
ENSG00000156282	CLDN17	0.209679	-2.25375	2.42e-08	down
ENSG00000197084	LCE1C	0.209571	-2.25449	1.57e-12	down
ENSG00000171954	CYP4F22	0.208033	-2.26512	9.03e-26	down
ENSG00000129437	KLK14	0.207476	-2.26898	1.22e-17	down
ENSG00000069667	RORA	0.207262	-2.27047	3.72e-16	down
ENSG00000187764	SEMA4D	0.204922	-2.28685	1.32e-07	down
ENSG00000168703	WFDC12	0.203137	-2.29948	2.7e-19	down
ENSG00000168461	RAB31	0.201035	-2.31448	0.000257748	down
ENSG00000057149	SERPINB3	0.196647	-2.34632	6.27e-13	down
ENSG00000159455	LCE2B	0.195419	-2.35536	7.61e-19	down
ENSG00000180316	PNPLA1	0.192415	-2.37771	9.35e-10	down
ENSG00000172155	LCE1D	0.191879	-2.38173	4.59e-13	down
ENSG00000136696	IL36B	0.19136	-2.38564	7.94e-05	down
ENSG00000103546	SLC6A2	0.190978	-2.38852	4.74e-07	down
ENSG00000185640	KRT79	0.185844	-2.42784	2.78e-13	down
ENSG00000167769	ACER1	0.182454	-2.45439	2.24e-10	down
ENSG00000203786	KPRP	0.182353	-2.4552	8.1e-16	down
ENSG00000244617	ASPRV1	0.182077	-2.45738	4.82e-13	down
ENSG00000235942	LCE6A	0.178489	-2.48609	5.89e-14	down
ENSG00000158220	ESYT3	0.177797	-2.4917	4.76e-08	down
ENSG00000127129	EDN2	0.176438	-2.50276	2.27e-20	down
ENSG00000176075	LINC00302	0.173509	-2.52692	2.34e-10	down
ENSG00000169550	MUC15	0.172425	-2.53596	3.34e-08	down
ENSG00000105880	DLX5	0.168767	-2.5669	4.26e-10	down
ENSG00000143520	FLG2	0.168424	-2.56983	2.46e-12	down
ENSG00000183734	ASCL2	0.164163	-2.6068	4.85e-09	down
ENSG00000153802	TMPRSS11D	0.162242	-2.62378	3.05e-09	down
ENSG00000284461	AC027644.4	0.154582	-2.69356	3.01e-09	down
ENSG00000135374	ELF5	0.153942	-2.69954	5.92e-15	down
ENSG00000203782	LORICRIN	0.150871	-2.72861	8.87e-14	down
ENSG00000196344	ADH7	0.150679	-2.73045	0.000903792	down
ENSG00000278952	AP003068.4	0.14952	-2.74159	4.07e-05	down
ENSG00000188373	C10orf99	0.149071	-2.74593	4.36e-08	down
ENSG00000126233	SLURP1	0.146021	-2.77575	2.19e-11	down
ENSG00000118402	ELOVL4	0.145914	-2.77681	2.46e-08	down
ENSG00000180638	SLC47A2	0.145652	-2.7794	0.00506628	down
ENSG00000130600	H19	0.144533	-2.79053	0.000495772	down
ENSG00000198854	C1orf68	0.143039	-2.80552	0.00207142	down
ENSG00000143631	FLG	0.14022	-2.83424	1.36e-16	down
ENSG00000173239	LIPM	0.138596	-2.85105	2.28e-13	down
ENSG00000126803	HSPA2	0.136854	-2.86929	0.00103103	down
ENSG00000164120	HPGD	0.130823	-2.93432	0.000428803	down
ENSG00000170477	KRT4	0.122955	-3.0238	1.19e-17	down
ENSG00000124429	POF1B	0.118084	-3.08212	2.97e-09	down
ENSG00000162591	MEGF6	0.117794	-3.08566	4.28e-10	down
ENSG00000172551	MUCL1	0.113845	-3.13486	4.78e-22	down
ENSG00000064300	NGFR	0.111517	-3.16467	0.000146901	down
ENSG00000134760	DSG1	0.111054	-3.17066	6.95e-05	down
ENSG00000196407	THEM5	0.110192	-3.18191	3.88e-10	down
ENSG00000211448	DIO2	0.109179	-3.19523	0.000242914	down
ENSG00000214313	AZGP1P1	0.105555	-3.24393	9.02e-10	down
ENSG00000134765	DSC1	0.102016	-3.29313	9.34e-05	down
ENSG00000180332	KCTD4	0.101565	-3.29953	0.004082	down
ENSG00000159337	PLA2G4D	0.0978934	-3.35264	5.11e-13	down
ENSG00000186395	KRT10	0.0978206	-3.35372	2.78e-21	down
ENSG00000172867	KRT2	0.0919438	-3.4431	7.19e-14	down
ENSG00000214860	EVPLL	0.0912175	-3.45455	1.92e-09	down
ENSG00000189182	KRT77	0.0867434	-3.5271	8.71e-22	down
ENSG00000125571	IL37	0.0785589	-3.67008	1.03e-12	down
ENSG00000108417	KRT37	0.078297	-3.6749	3.44e-08	down
ENSG00000214822	KRT16P3	0.0769136	-3.70062	1.31e-11	down
ENSG00000090512	FETUB	0.0715713	-3.80448	1.44e-16	down
ENSG00000105668	UPK1A	0.0691669	-3.85378	3.87e-11	down
ENSG00000161798	AQP5	0.0654206	-3.93411	5.99e-10	down
ENSG00000255730	AC011462.1	0.0554321	-4.17313	9.27e-11	down
ENSG00000248405	PRR5-ARHGAP8	0.0529344	-4.23965	0.00127952	down
ENSG00000167768	KRT1	0.0433229	-4.52873	2.08e-32	down
ENSG00000164687	FABP5	0.041628	-4.5863	2.7e-07	down
ENSG00000166634	SERPINB12	0.0387572	-4.68939	5.09e-14	down
ENSG00000273003	ARL2-SNX15	0.0383295	-4.7054	0.000115427	down
ENSG00000197953	AADACL2	0.0190754	-5.71214	0.000644157	down
ENSG00000257341	AL928654.3	0.00713142	-7.13159	0.000495141	down
